# Supplementary material for: Isoprostanoid Profiling of Marine Microalgae
Source: MDPI journal article supplement (doi:10.3390/biom10071073), 2020-07-18
Supplement: s1 [file s1]

| Analyte                                                                  | Linear regression | R <sup>2</sup> |
|--------------------------------------------------------------------------|-------------------|----------------|
| <b><i>Alpha-Linolenic acid</i></b>                                       |                   |                |
| 16-F <sub>1t</sub> -PhytoP                                               | y = 1,59081 x     | 0,998          |
| 16- <i>epi</i> -16-F <sub>1t</sub> -PhytoP                               | y = 1,60226 x     | 0,996          |
| 9-F <sub>1t</sub> -PhytoP                                                | y = 1,20477 x     | 0,996          |
| 9- <i>epi</i> -9-F <sub>1t</sub> -PhytoP                                 | y = 1,07008 x     | 0,998          |
| <i>ent</i> -16-B <sub>1</sub> -PhytoP                                    | y = 2,23001 x     | 0,998          |
| <i>ent</i> -9-L <sub>1</sub> -PhytoP                                     | y = 3,28989 x     | 0,999          |
| 16( <i>RS</i> )-16-A <sub>1</sub> -PhytoP                                | y = 1,81896 x     | 0,999          |
| <i>ent</i> -9- <i>epi</i> -9-D <sub>1t</sub> -PhytoP                     | y = 3,50478x      | 0,997          |
| <i>ent</i> -9-D <sub>1t</sub> -PhytoP                                    | y = 2,94021x      | 0,999          |
| <i>ent</i> -16( <i>RS</i> )-9- <i>epi</i> -ST-Δ <sup>14</sup> -10-PhytoF | y = 2,51294x      | 0,995          |
| <i>ent</i> -9( <i>RS</i> )-12- <i>epi</i> -ST-Δ <sup>10</sup> -13-PhytoF | y = 1,12189 x     | 0,996          |
| <i>ent</i> -16( <i>RS</i> )-13- <i>epi</i> -ST-Δ <sup>14</sup> -9-PhytoF | y = 3,10290 x     | 0,996          |
| <b><i>Arachidonic acid</i></b>                                           |                   |                |
| 15-A <sub>2</sub> -IsoP                                                  | y = 3,55777 x     | 0,993          |
| 15-F <sub>2t</sub> -IsoP                                                 | y = 3,51033 x     | 0,999          |
| 15- <i>epi</i> -15-F <sub>2t</sub> -IsoP                                 | y = 3,61580 x     | 0,995          |
| 5( <i>RS</i> )-5-F <sub>2t</sub> -IsoP                                   | y = 1,87935 x     | 0,995          |
| 5-F <sub>2c</sub> -IsoP                                                  | y = 4,05767 x     | 0,997          |
| <b><i>Adrenic acid</i></b>                                               |                   |                |
| <i>ent</i> -7( <i>RS</i> )-7-F <sub>2t</sub> -dihomo-IsoP                | y = 2,38407 x     | 0,984          |
| 7( <i>RS</i> )-ST-Δ <sup>8</sup> -11-dihomo-IsoF                         | y = 1,05772 x     | 0,986          |
| <b><i>Eicosapentaenoic acid</i></b>                                      |                   |                |
| 18- <i>epi</i> -18-F <sub>3t</sub> -IsoP                                 | y = 0,88080 x     | 0,988          |
| 18-F <sub>3t</sub> -IsoP                                                 | y = 2,35170 x     | 0,991          |
| 5- <i>epi</i> -5-F <sub>3t</sub> -IsoP                                   | y = 1,54771 x     | 0,985          |
| 5-F <sub>3t</sub> -IsoP                                                  | y = 0,55624 x     | 0,977          |
| 8- <i>epi</i> -8-F <sub>3t</sub> -IsoP                                   | y = 5,14933 x     | 0,998          |
| 8-F <sub>3t</sub> -IsoP                                                  | y = 7,11727 x     | 0,994          |
| <b><i>Docosapentaenoic acid</i></b>                                      |                   |                |
| 4-F <sub>3t</sub> -NeuroP                                                | y = 0,68245 x     | 0,990          |
| <b><i>Docosahexaenoic acid</i></b>                                       |                   |                |
| 4( <i>RS</i> )-4-F <sub>4t</sub> -NeuroP                                 | y = 2,15917 x     | 0,986          |
| 10- <i>epi</i> -F <sub>4t</sub> -NeuroP                                  | y = 3,04646 x     | 0,997          |
| 10-F <sub>4t</sub> -NeuroP                                               | y = 5,30507 x     | 0,997          |
| 13( <i>RS</i> )-13-F <sub>4t</sub> -NeuroP                               | y = 2,03321 x     | 0,995          |
|                                                                          | y = 1,00581 x     | 0,993          |
| 14( <i>RS</i> )-14-F <sub>4t</sub> -NeuroP                               | y = 0,31517 x     | 0,997          |
| 20- <i>epi</i> -20-F <sub>4t</sub> -NeuroP                               | y = 1,16434 x     | 0,985          |
| 20-F <sub>4t</sub> -NeuroP                                               | y = 0,94180 x     | 0,991          |
