# Supplementary material for: Isoprostanoid Profiling of Marine Microalgae
Source: MDPI journal article supplement (doi:10.3390/biom10071073), 2020-07-18
Supplement: s1 [file s1]

| Analyte                                                                  | Retention Time<br>(min) | m/z Precursor<br>Ion | m/z Product Ion | DP (volts) | EP (volts) | CE (volts) | CXP (volts) |
|--------------------------------------------------------------------------|-------------------------|----------------------|-----------------|------------|------------|------------|-------------|
| <b><i>Alpha-Linolenic acid</i></b>                                       |                         |                      |                 |            |            |            |             |
| 16-F <sub>11</sub> -PhytoP                                               | 6,22                    | 327,2                | 283             | -100       | -5         | -27        | -15         |
|                                                                          |                         |                      | 251             | -100       | -5         | -27        | -15         |
| 16- <i>epi</i> -16-F <sub>11</sub> -PhytoP                               | 5,73                    | 327,2                | 283             | -100       | -5         | -27        | -15         |
|                                                                          |                         |                      | 251             | -100       | -5         | -27        | -15         |
| 9-F <sub>11</sub> -PhytoP                                                | 5,93                    | 327,2                | 283             | -100       | -5         | -27        | -15         |
|                                                                          |                         |                      | 171             | -100       | -5         | -27        | -15         |
| 9- <i>epi</i> -9-F <sub>11</sub> -PhytoP                                 | 6,44                    | 327,2                | 283             | -100       | -5         | -27        | -15         |
|                                                                          |                         |                      | 171             | -100       | -5         | -27        | -15         |
| <i>ent</i> -16-B <sub>1</sub> -PhytoP                                    | 10,62                   | 307,2                | 235             | -130       | -5         | -28        | -18         |
|                                                                          |                         |                      | 223             | -130       | -5         | -28        | -18         |
| <i>ent</i> -9-L <sub>1</sub> -PhytoP                                     | 10,79                   | 307,2                | 185             | -152       | -9         | -28        | -10         |
|                                                                          |                         |                      | 109             | -152       | -9         | -29        | -6          |
| 16( <i>RS</i> )-16-A <sub>1</sub> -PhytoP                                | 11,26                   | 307,2                | 289             | -115       | -9         | -15        | -17         |
|                                                                          |                         |                      | 249             | -115       | -9         | -22        | -18         |
| <i>ent</i> -9- <i>epi</i> -9-D <sub>11</sub> -PhytoP                     | 7,63                    | 325,0                | 289             | -121       | -10        | -22        | -18         |
|                                                                          |                         |                      | 123             | -121       | -10        | -34        | -7          |
|                                                                          |                         |                      | 135             | -121       | -10        | -29        | -7          |
| <i>ent</i> -9-D <sub>11</sub> -PhytoP                                    | 8,43                    | 325,0                | 289             | -121       | -10        | -22        | -8          |
|                                                                          |                         |                      | 123             | -121       | -10        | -34        | -7          |
|                                                                          |                         |                      | 135             | -121       | -10        | -29        | -7          |
| <i>ent</i> -16( <i>RS</i> )-9- <i>epi</i> -ST-Δ <sup>14</sup> -10-PhytoF | 5,00                    | 343,2                | 209             | -151       | -8         | -31        | -7          |
|                                                                          |                         |                      | 83              | -151       | -8         | -37        | -7          |
| <i>ent</i> -9( <i>RS</i> )-12- <i>epi</i> -ST-Δ <sup>10</sup> -13-PhytoF | 5,00                    | 343,2                | 237             | -161       | -7         | -33        | -27         |
|                                                                          |                         |                      | 87              | -161       | -7         | -36        | -27         |
| <i>ent</i> -16( <i>RS</i> )-13- <i>epi</i> -ST-Δ <sup>14</sup> -9-PhytoF | 4,89                    | 343,2                | 201             | -158       | -6         | -35        | -12         |
|                                                                          |                         |                      | 127             | -158       | -6         | -43        | -7          |
| C19-PhytoP                                                               | 9,10                    | 241,3                | 297             | -149       | -7         | -30        | -16         |
|                                                                          |                         |                      | 279             | -149       | -7         | -32        | -14         |
| <b><i>Arachidonic acid</i></b>                                           |                         |                      |                 |            |            |            |             |
| 15-A <sub>2</sub> -IsoP                                                  | 15,21                   | 333,2                | 271             | -141       | -8         | -17        | -17         |
|                                                                          |                         |                      | 189             | -141       | -8         | -23        | -17         |
| 15-F <sub>21</sub> -IsoP                                                 | 10,50                   | 353,2                | 193             | -147       | -5         | -32        | -10         |
|                                                                          |                         |                      | 247             | -100       | -10        | -37        | -27         |
| 15- <i>epi</i> -15-F <sub>21</sub> -IsoP                                 | 10,30                   | 353,2                | 193             | -147       | -5         | -32        | -10         |
|                                                                          |                         |                      | 247             | -100       | -10        | -37        | -27         |
| 5( <i>RS</i> )-5-F <sub>21</sub> -IsoP                                   | 10,91                   | 353,2                | 115             | -203       | -5         | -25        | -37         |
|                                                                          |                         |                      | 309             | -203       | -5         | -25        | -37         |
| 5-F <sub>22</sub> -IsoP                                                  | 13,40                   | 353,2                | 115             | -149       | -5         | -29        | -12         |
|                                                                          |                         |                      | 309             | -149       | -5         | -27        | -20         |
| C21-15-F <sub>21</sub> -IsoP                                             | 12,50                   | 367,0                | 193             | -174       | -3         | -34        | -27         |
|                                                                          |                         |                      | 261             | -174       | -3         | -34        | -27         |
| d <sub>4</sub> -15-F <sub>21</sub> -IsoP                                 | 10,50                   | 257,2                | 197             | -65        | -6         | -35        | -12         |
|                                                                          |                         |                      | 251             | -65        | -6         | -35        | -12         |
|                                                                          |                         |                      | 213             | -100       | -10        | -37        | -27         |
| <b><i>Adrenic acid</i></b>                                               |                         |                      |                 |            |            |            |             |
| <i>ent</i> -7( <i>RS</i> )-7-F <sub>21</sub> -dihomo-IsoP                | 13,43                   | 381,3                | 143             | -161       | -6         | -32        | -8          |
|                                                                          |                         |                      | 327             | -161       | -6         | -28        | -18         |
| 7( <i>RS</i> )-ST-Δ <sup>8</sup> -11-dihomo-IsoF                         | 13,28                   | 397,4                | 201             | -185       | -5         | -34        | -11         |
|                                                                          |                         |                      | 183             | -185       | -5         | -36        | -10         |
| <b><i>Eicosapentaenoic acid</i></b>                                      |                         |                      |                 |            |            |            |             |
| 18- <i>epi</i> -18-F <sub>31</sub> -IsoP                                 | 8,37                    | 351,2                | 289             | -167       | -7         | -27        | -16         |
|                                                                          |                         |                      | 249             | -167       | -7         | -29        | -13         |
| 18-F <sub>31</sub> -IsoP                                                 | 9,06                    | 351,2                | 289             | -167       | -7         | -27        | -16         |
|                                                                          |                         |                      | 249             | -167       | -7         | -29        | -13         |
| 5- <i>epi</i> -5-F <sub>31</sub> -IsoP                                   | 9,14                    | 351,2                | 307             | -140       | -3         | -24        | -22         |
|                                                                          |                         |                      | 115             | -140       | -3         | -27        | -7          |
| 5-F <sub>31</sub> -IsoP                                                  | 8,91                    | 351,2                | 307             | -140       | -3         | -24        | -22         |
|                                                                          |                         |                      | 115             | -140       | -3         | -27        | -7          |
| 8- <i>epi</i> -8-F <sub>31</sub> -IsoP                                   | 9,29                    | 351,3                | 127             | -151       | -8         | -31        | -7          |
|                                                                          |                         |                      | 155             | -151       | -8         | -27        | -10         |
| 8-F <sub>31</sub> -IsoP                                                  | 8,56                    | 351,3                | 127             | -151       | -8         | -31        | -7          |
|                                                                          |                         |                      | 155             | -151       | -8         | -27        | -10         |
| <b><i>Docosapentaenoic acid</i></b>                                      |                         |                      |                 |            |            |            |             |
| 4-F <sub>31</sub> -NeuroP                                                | 14,84                   | 379,2                | 101             | -174       | -4         | -29        | -8          |
|                                                                          |                         |                      | 273             | -174       | -4         | -32        | -12         |
| <b><i>Docosahexaenoic acid</i></b>                                       |                         |                      |                 |            |            |            |             |
| 4( <i>RS</i> )-4-F <sub>41</sub> -NeuroP                                 | 12,50                   | 377,2                | 101             | -161       | -5         | -28        | -7          |
|                                                                          |                         |                      | 217             | -161       | -5         | -27        | -16         |
| 10- <i>epi</i> -F <sub>41</sub> -NeuroP                                  | 11,46                   | 377,2                | 153             | -149       | -4         | -27        | -14         |
|                                                                          |                         |                      | 110             | -149       | -4         | -27        | -8          |
| 10-F <sub>41</sub> -NeuroP                                               | 11,02                   | 377,2                | 153             | -149       | -4         | -27        | -8          |
|                                                                          |                         |                      | 110             | -149       | -4         | -27        | -8          |
| 13( <i>RS</i> )-13-F <sub>41</sub> -NeuroP                               | 10,8 ; 11,18            | 377,2                | 193             | -149       | -4         | -27        | -8          |
| 14( <i>RS</i> )-14-F <sub>41</sub> -NeuroP                               | 11,65                   | 377,2                | 179             | -166       | -5         | -28        | -10         |
|                                                                          |                         |                      | 205             | -166       | -5         | -29        | -12         |
| 20- <i>epi</i> -20-F <sub>41</sub> -NeuroP                               | 10,80                   | 377,2                | 315             | -164       | -3         | -26        | -18         |
|                                                                          |                         |                      | 323             | -164       | -3         | -26        | -18         |
|                                                                          |                         |                      | 259             | -164       | -3         | -27        | -14         |
| 20-F <sub>41</sub> -NeuroP                                               | 11,26                   | 377,2                | 315             | -164       | -3         | -26        | -18         |
|                                                                          |                         |                      | 323             | -164       | -3         | -26        | -18         |
|                                                                          |                         |                      | 259             | -164       | -3         | -27        | -14         |
| d <sub>4</sub> -10- <i>epi</i> -10-F <sub>41</sub> -NeuroP               | 11,00                   | 381,2                | 157             | -155       | -5         | -27        | -11         |
|                                                                          |                         |                      | 110             | -155       | -5         | -32        | -6          |
